# Supplementary material for: The response of precipitation characteristics to global warming from climate projections
Source: Copernicus journal article supplement (doi:10.5194/esd-10-73-2019), 2019-02-06
Supplement: Supplementary file 1 [file esd-10-73-2019-supplement.pdf]

Supplement of Earth Syst. Dynam., 10, 73–89, 2019  
<https://doi.org/10.5194/esd-10-73-2019-supplement>  
© Author(s) 2019. This work is distributed under  
the Creative Commons Attribution 4.0 License.

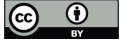

*Supplement of*

## **The response of precipitation characteristics to global warming from climate projections**

**Filippo Giorgi et al.**

*Correspondence to:* Filippo Giorgi ([giorgi@ictp.it](mailto:giorgi@ictp.it))

The copyright of individual parts of the supplement might differ from the CC BY 4.0 License.

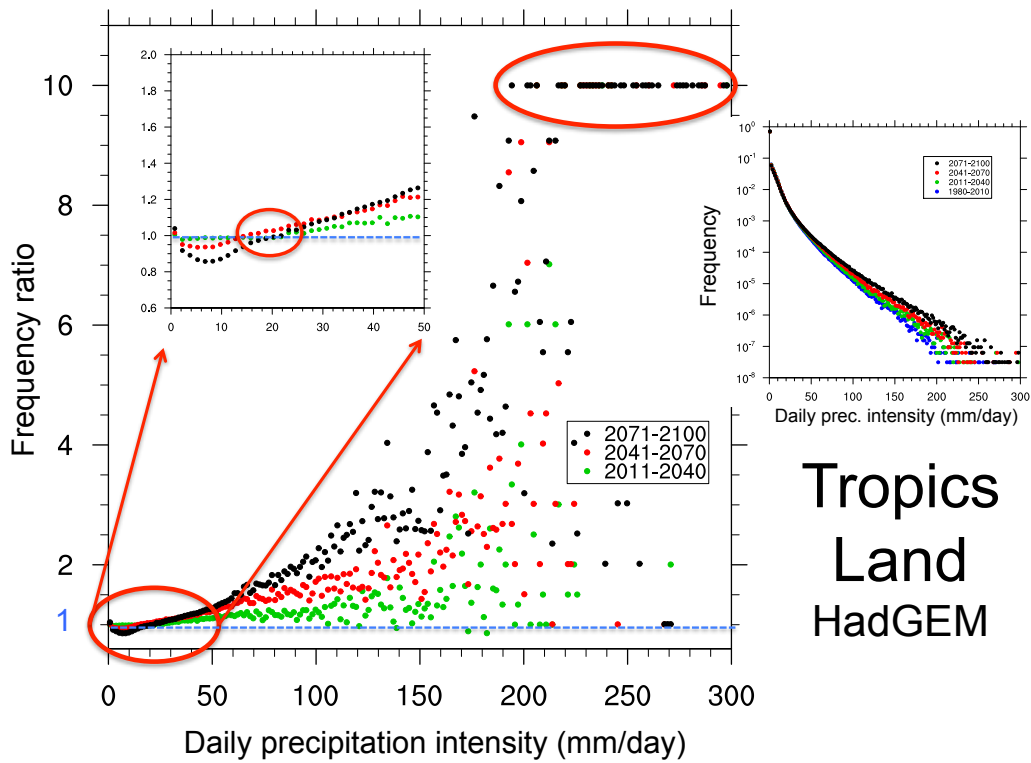

**Figure S1.** Small right panel: Probability density function (PDF) defined as the normalized frequency of occurrence of daily precipitation events of intensity within a certain bin interval over land regions in the tropics ( $30^{\circ}\text{S} - 30^{\circ}\text{N}$ ) for the reference period 1981-2010 and three future time slices (2011-2040, 2041-2070, 2071-2100) in the HadGEM2-ES model. The frequency is normalized by the total number of days (including dry days, i.e. days with precipitation lower than 1 mm/day). Large central panel: Ratio of future to reference normalized frequency of daily precipitation intensity for the three future time slices. The small inset panel shows a zoom on the part of the curves highlighted by the corresponding red oval. Ratio values of 10 (highlighted in a red oval) are used when events occur in the future time slice which are not present in the reference period for a given intensity bin.

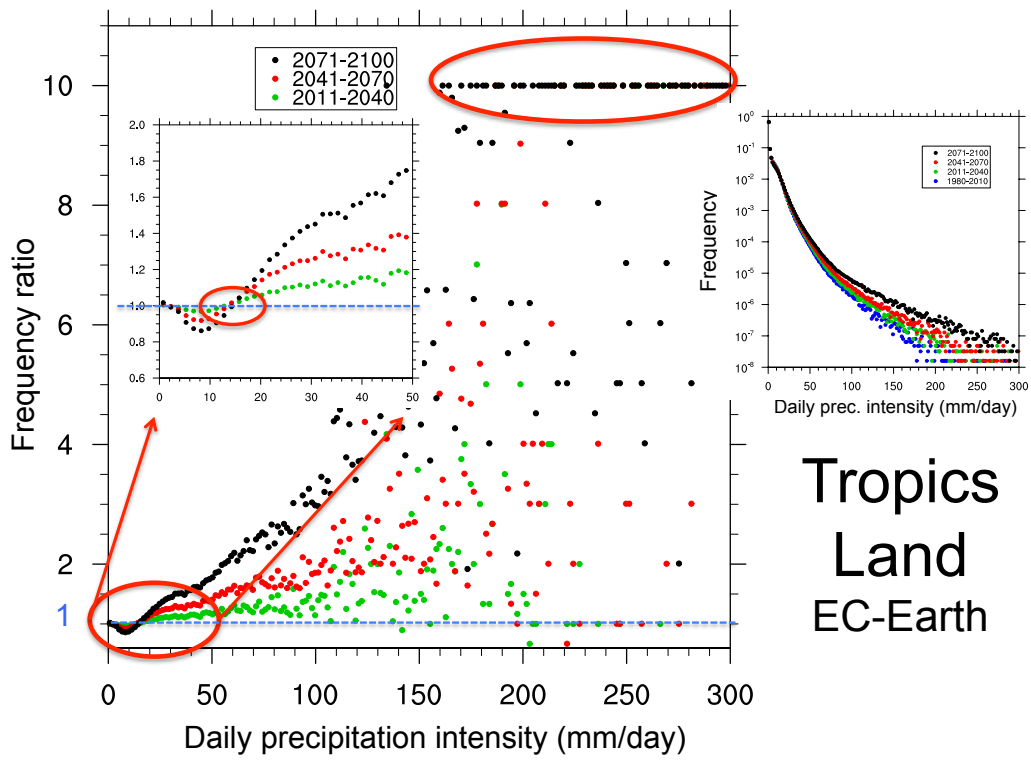

**Figure S2.** Same as Figure S1 but for the EC-EARTH GCM.

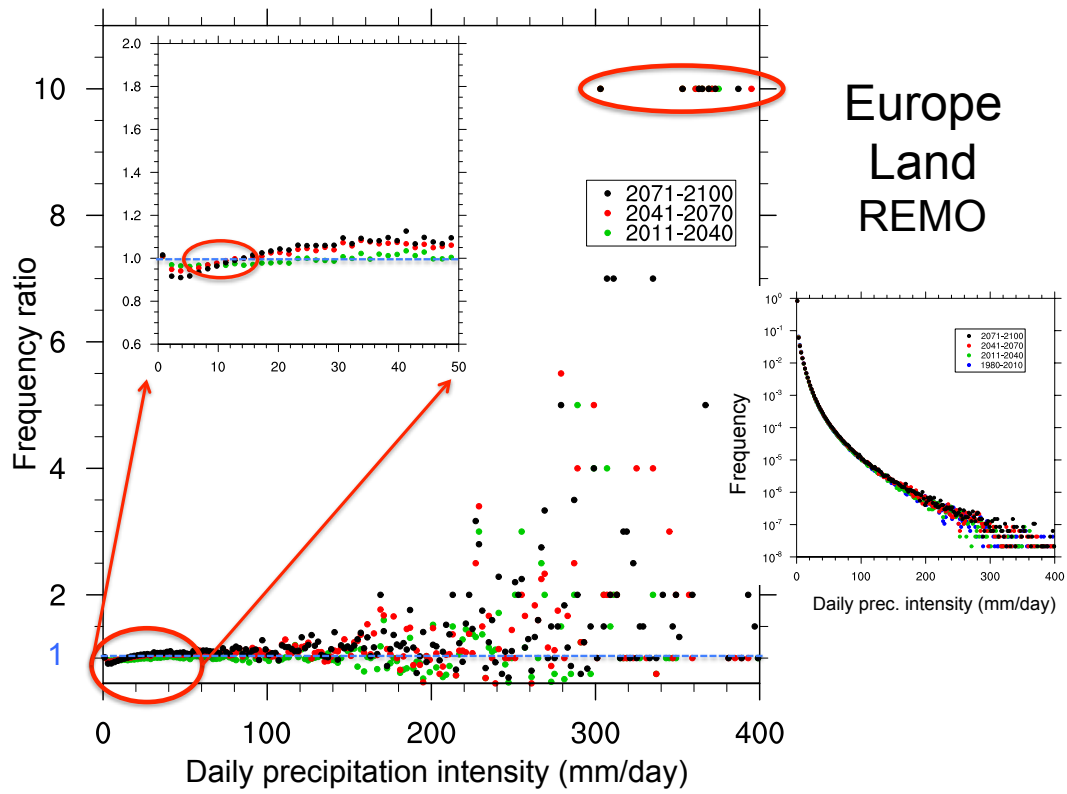

**Figure S3.** Same as Figure S1 but for the REMO RCM over the entire European land territory for EURO-CORDEX simulations.

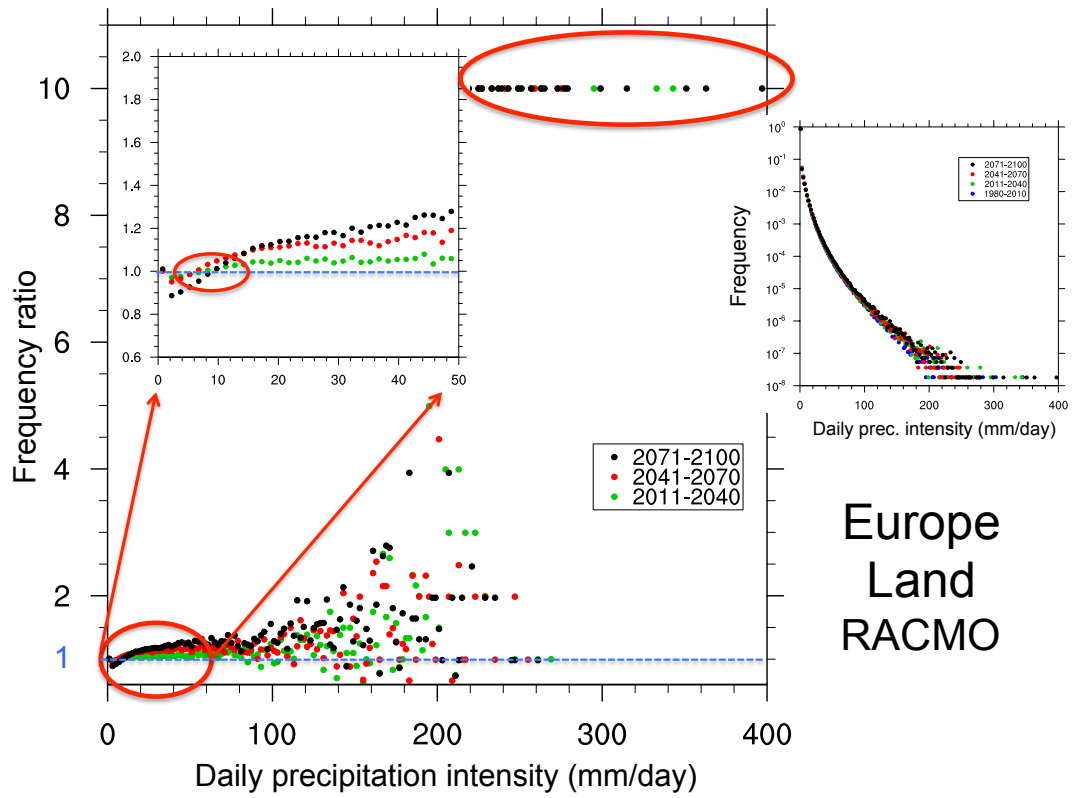

**Figure S4.** Same as Figure S3 but for the RACMO RCM.
